# Supplementary material
Source: PubMed Central journal article supplement (PMC6338086)
Supplement: NIHMS1517021-supplement-1.pdf [file NIHMS1517021-supplement-1.pdf]

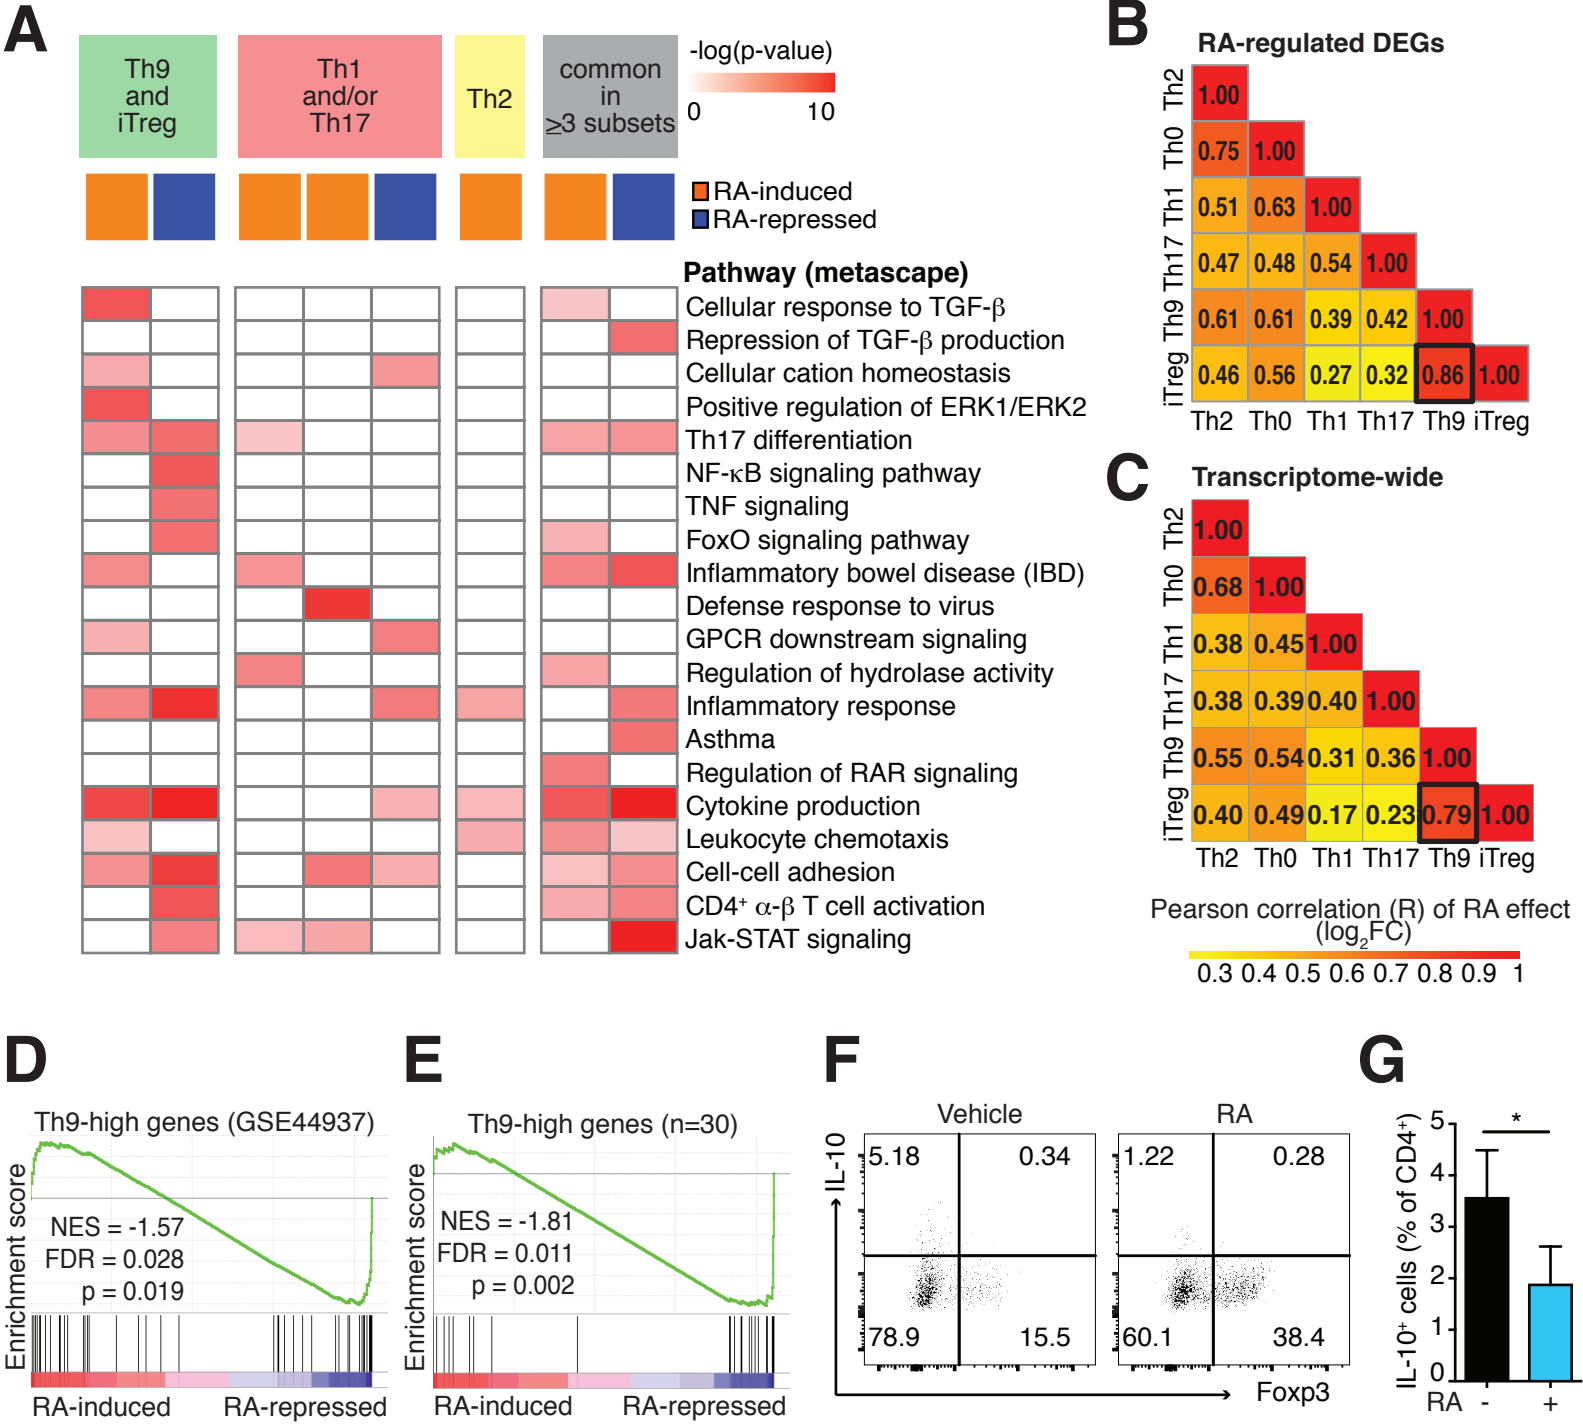

**Figure S1, related to Figure 1-3. A. Metascape pathway analysis of RA-regulated modules.**  $-\log(p\text{-value})$  are shown for pathways enriched in each module. **B,C. Correlation plots showing regression analysis of RA effect in T cells.** Pearson's correlation (R) was calculated for RA effect ( $\log_2$  normalized fold-change in gene expression, RA vs. vehicle control) of 1025 RA-regulated genes. High R value indicates a similar effect. Data are shown for RA-regulated differentially expressed genes, or DEGs (B) and transcriptome-wide (C). **D. RA effect on Th9-high genes, Gene Set Enrichment Analysis (GSEA).** Gene Set Enrichment Analysis (GSEA) plot depicts effect of RA on the entire Th9-high geneset, accounting for the net, or average, effect on all the genes in the geneset. **E. RA effect on an independently generated Th9-high geneset, GSEA.** A list of Th9-high genes was generated using a public dataset that contained gene expression data on Th9, Th2, and iTreg cells (GSE44973). GSEA plot depicts the effect of RA on the average, or net, expression of genes in this geneset. **F,G. Flow cytometric analysis of IL-10 vs. Foxp3 expression Th9 cells differentiated in the presence of vehicle control or RA 1000nM.** F. Representative flow cytometric plots showing IL-10 vs. Foxp3 expression. G. Bar graphs summarizing IL-10 expression (Data are shown as mean  $\pm$  SEM; n=6; \*p<0.05 paired t-test)

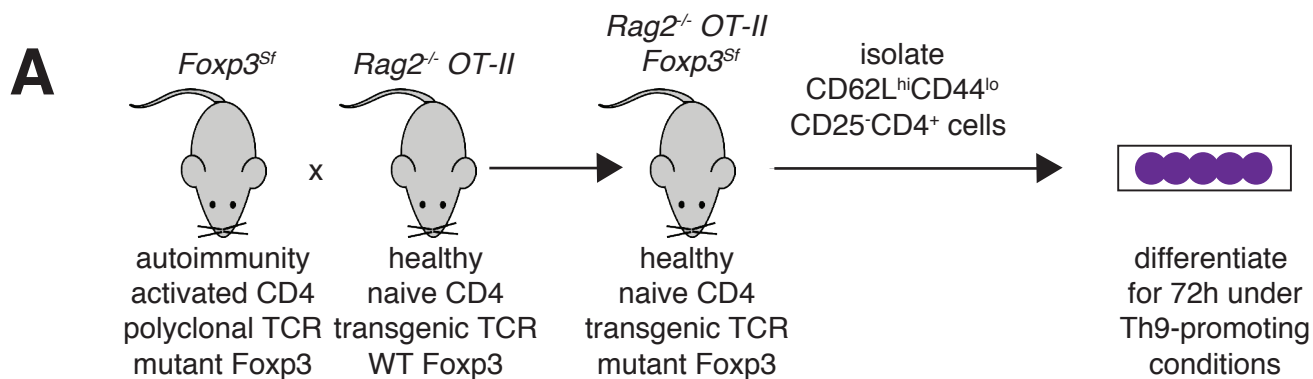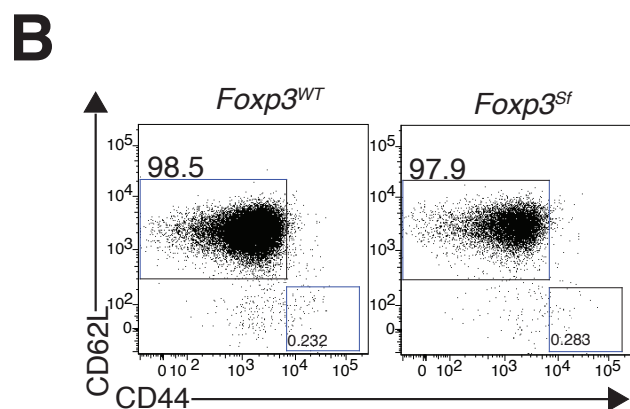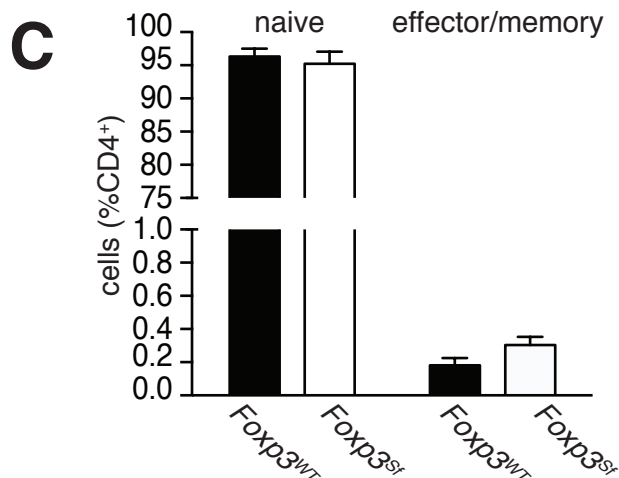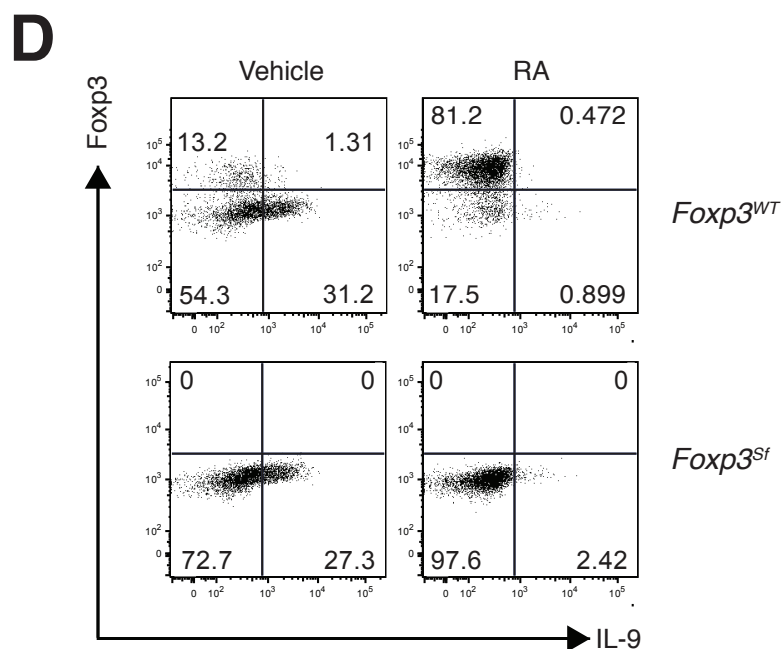

**Figure S2, related to Figure 4. A. Generation of *Rag2<sup>-/-</sup> OT-II Foxp3<sup>Sf</sup>* mice.** Mice carrying the *Foxp3<sup>Sf</sup>* (Scurfy) mutation were crossed to *Rag2<sup>-/-</sup> OT-II* mice to generate *Rag2<sup>-/-</sup> OT-II Foxp3<sup>Sf</sup>* mice. CD4<sup>+</sup> T cells from *Rag2<sup>-/-</sup> OT-II Foxp3<sup>Sf</sup>* (denoted *Foxp3<sup>Sf</sup>*) and *Rag2<sup>-/-</sup> OT-II Foxp3<sup>WT</sup>* mice (denoted *Foxp3<sup>WT</sup>*) were compared. Naïve (CD62L<sup>hi</sup>/CD44<sup>lo</sup>/CD25<sup>-</sup>/CD4<sup>+</sup>) T cells were isolated and cultured in vitro for 72 hours under Th9-promoting conditions with either vehicle control or 1000 nM RA. **B-C. Flow cytometric analysis of naïve and effector/memory cell surface markers in CD4<sup>+</sup> T cells from *Foxp3<sup>WT</sup>* and *Foxp3<sup>Sf</sup>* mice.** B. Representative flow cytometric plots show CD62L and CD44 expression in *Foxp3<sup>WT</sup>* and *Foxp3<sup>Sf</sup>* CD4<sup>+</sup> T cells. C. Bar graphs summarize CD62L and CD44 expression in *Foxp3<sup>WT</sup>* and *Foxp3<sup>Sf</sup>* CD4<sup>+</sup> T cells (Data are shown as mean ± SEM; n=4). **D. Representative flow cytometric plot showing IL-9 vs. Foxp3 expression in *Foxp3<sup>WT</sup>* and *Foxp3<sup>Sf</sup>* Th9 cells.**

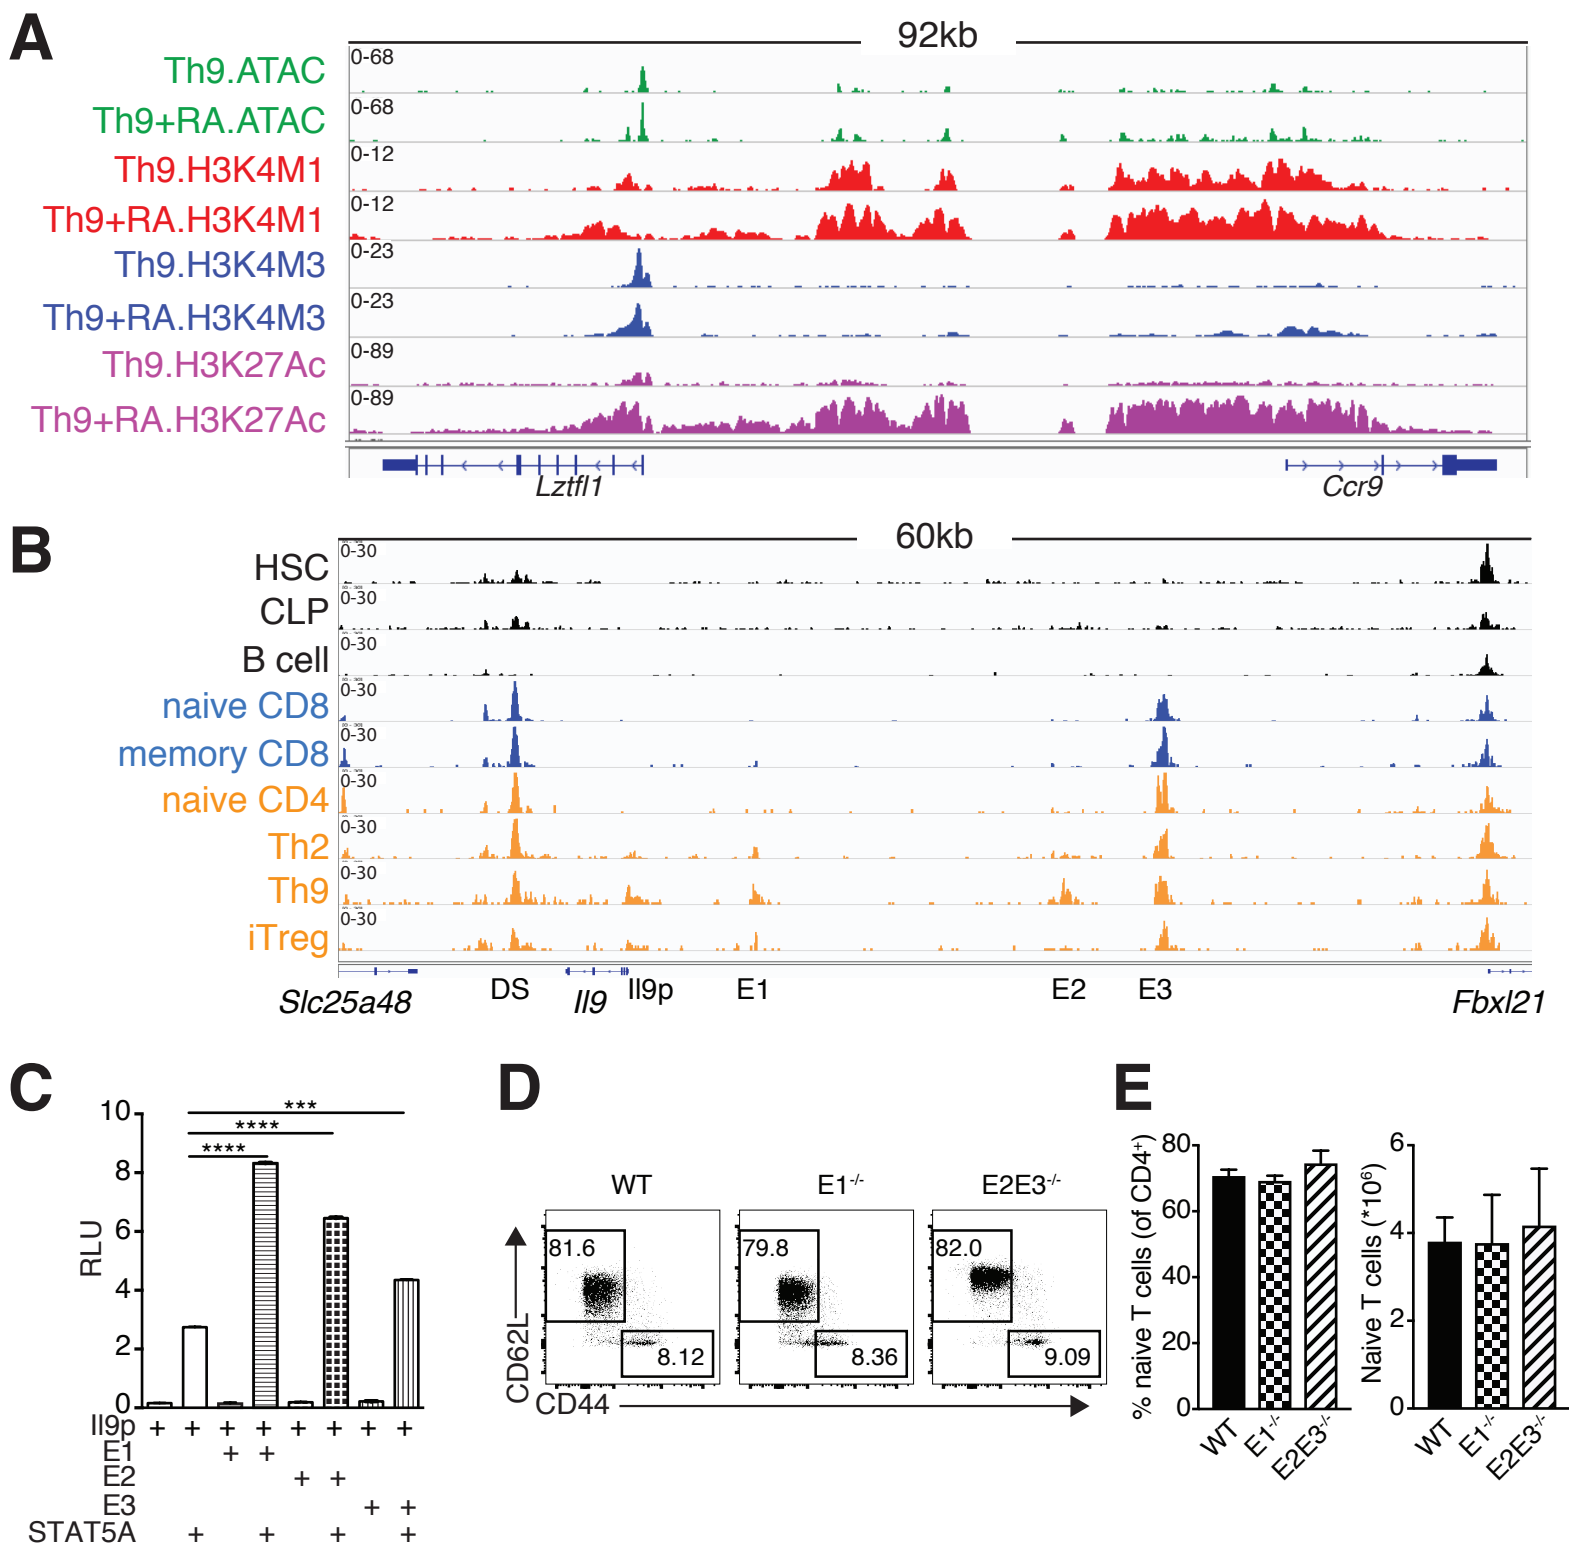

**Figure S3, related to Figure 5. A. *Ccr9* regulatory elements identified by histone modifications and chromatin accessibility, and RA effect on regulatory elements.** *Ccr9* gene tracks of ATAC, H3K4M1, H3K4M3, and H3K27Ac in Th9 cells polarized in the presence of vehicle control or 1000 nM RA. **B. *Il9* regulatory elements identified by chromatin accessibility in multiple cell types.** *Il9* gene tracks showing ATAC peaks in four CD4<sup>+</sup> T cell subsets (yellow), hematopoietic stem cells (HSC), common lymphoid progenitors (CLP), B cells, and CD8<sup>+</sup> T cells. Data from Th2, naive CD4<sup>+</sup> T cells, CD8<sup>+</sup> T cells, HSC, and CLP were obtained from public data (GSE77695). **C. Luciferase enhancer assay testing *Il9* regulatory elements E1-E3.** The *Il9* promoter was cloned either alone or in tandem with E1, E2, or E3 into the luciferase reporter vector pGL4.23. HEK293T cells were cotransfected with each construct and constitutively active Stat5A (n=4, \*\*\*p<0.005, \*\*\*\*p<0.001, unpaired t-test). **D-E. Flow cytometric analysis of naïve and memory cell surface markers in CD4<sup>+</sup> T cells from *E1*<sup>-/-</sup> and *E2E3*<sup>-/-</sup> mice.** D. Representative flow cytometric plots show CD62L and CD44 expression in CD4<sup>+</sup> T cells isolated from spleen and lymph nodes of WT, *E1*<sup>-/-</sup>, and *E2E3*<sup>-/-</sup> mice. E. Bar graphs summarize percentages and absolute numbers of naïve (CD62L<sup>+</sup>CD25<sup>-</sup>CD44<sup>lo</sup>) CD4<sup>+</sup> T cells from WT, *E1*<sup>-/-</sup>, and *E2E3*<sup>-/-</sup> mice. Data are shown as mean ± SEM; n=3-4

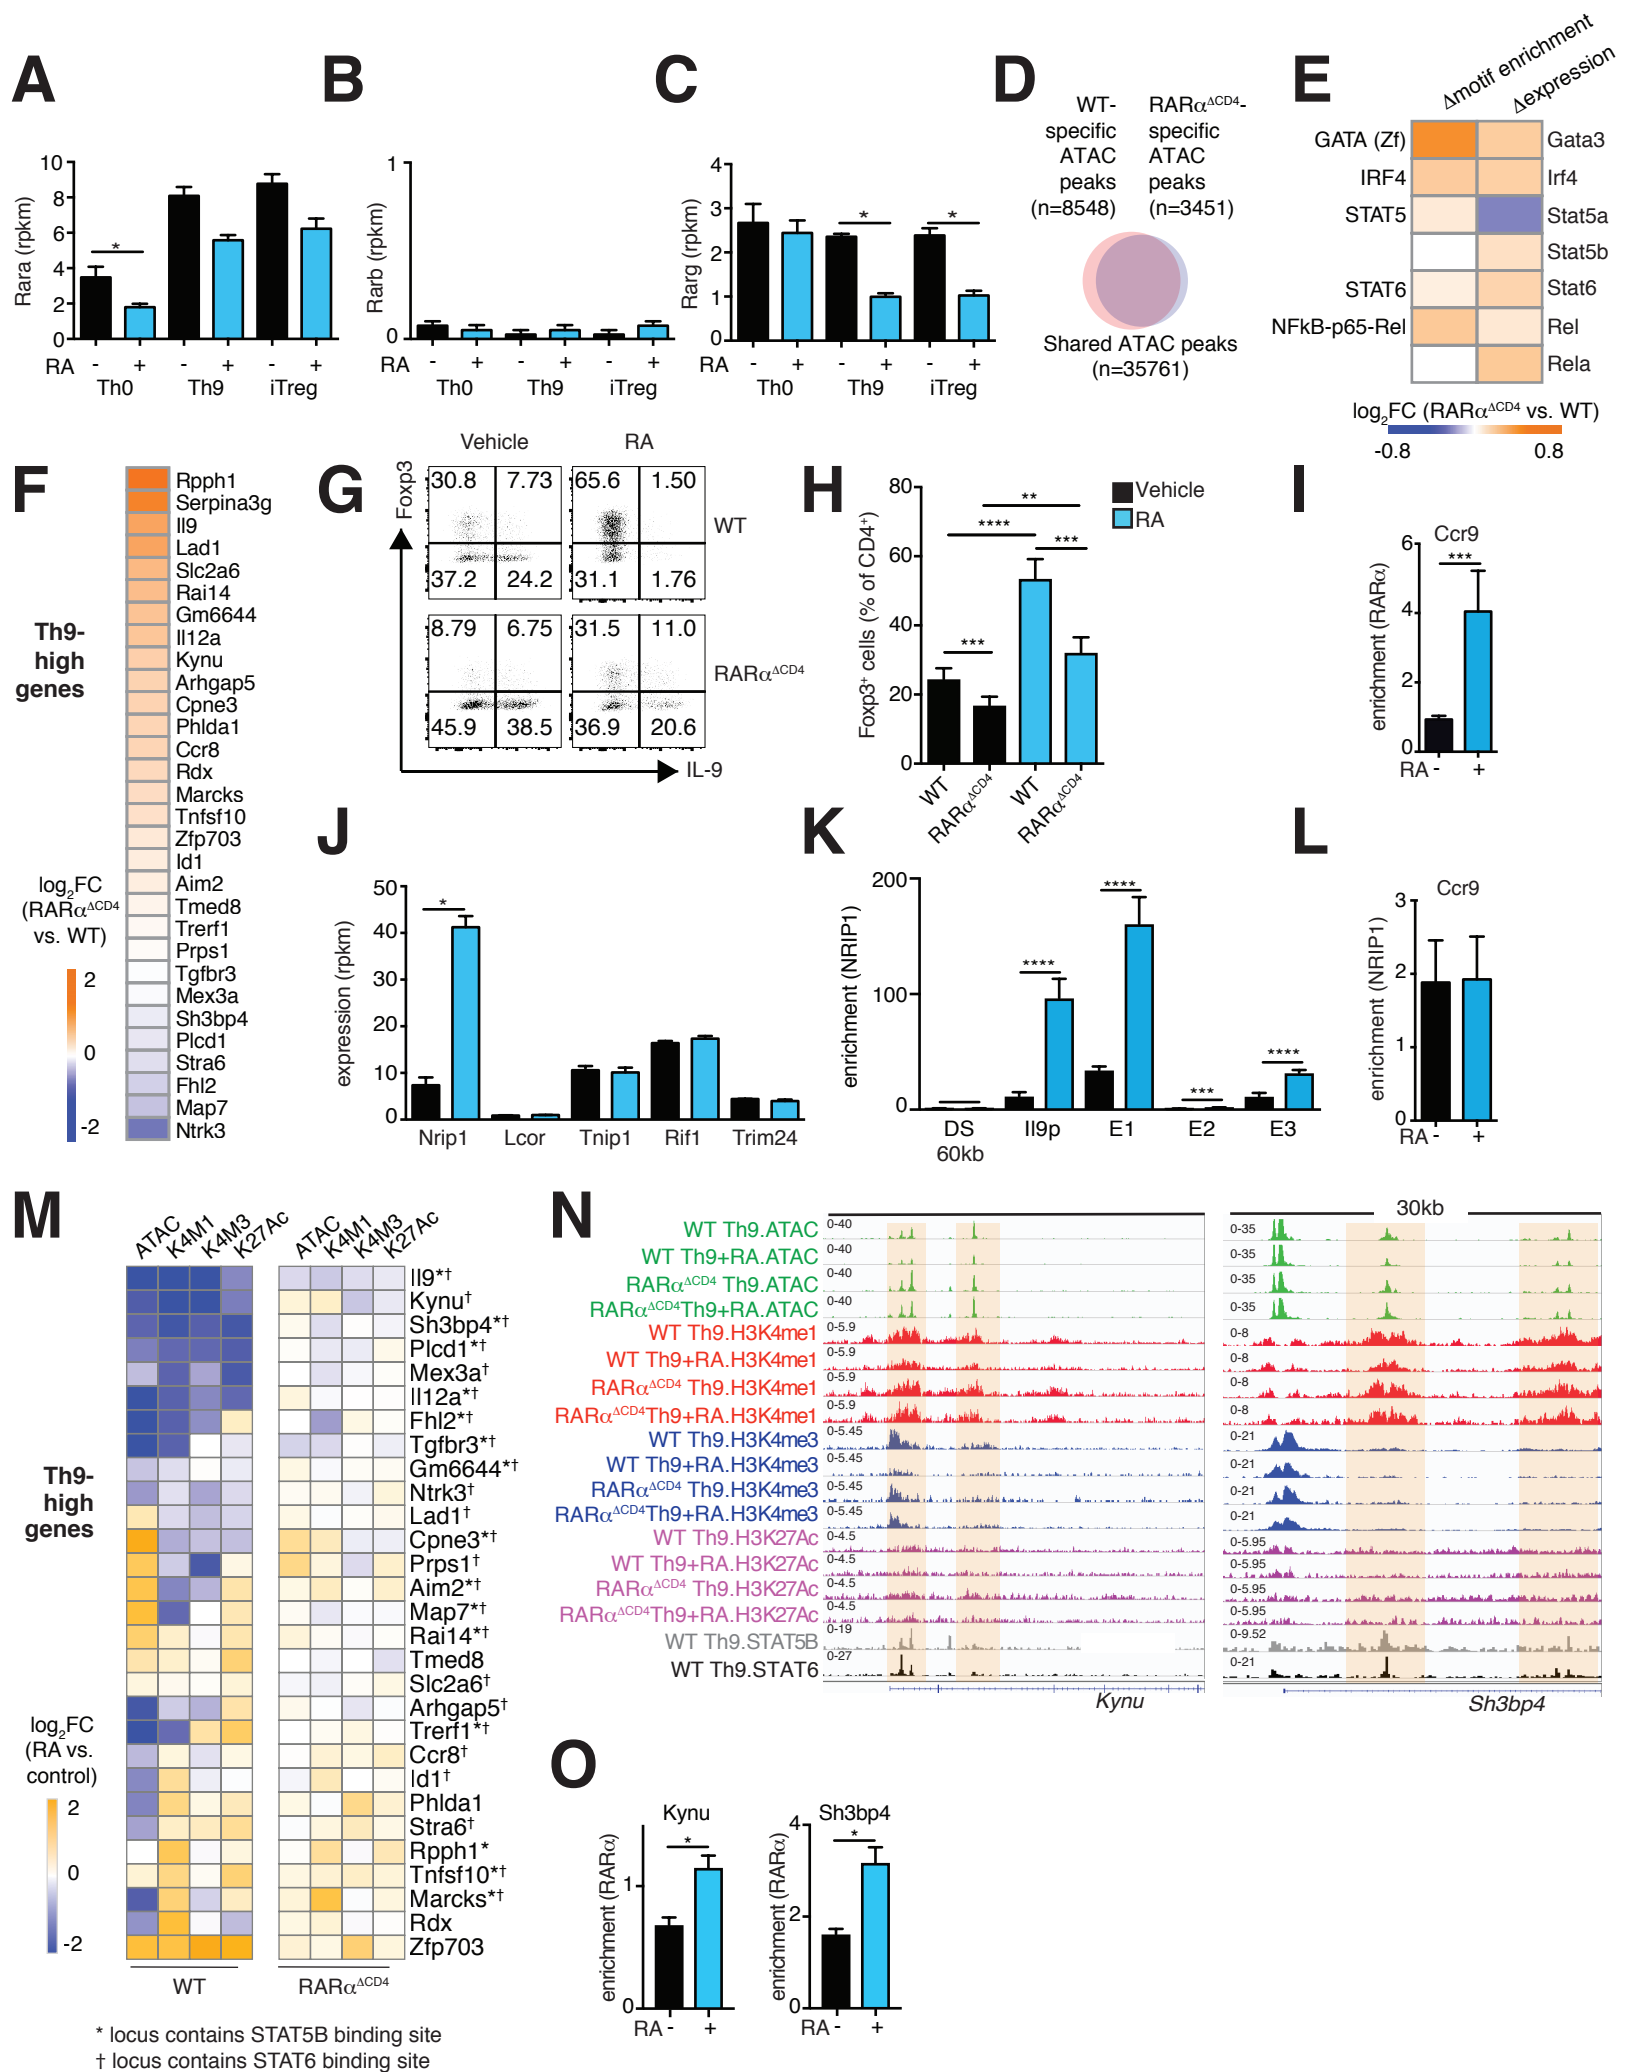

**Figure S4. Related to Figure 6. A-C. *Rara*, *Rarb*, and *Rarg* expression in three different Th subsets treated with vehicle control or RA.** Bar graphs summarize expression values (reads per kilobase of transcript per million mapped reads, or rpkm) of *Rara*, *Rarb*, and *Rarg* from RNA-sequencing (n=2, \*FDR<0.05). **D,E. TFs with RAR $\alpha$ -regulated motif accessibility and RAR $\alpha$ -regulated gene expression.** Venn diagram (D) shows changes in global genomic accessibility (number of ATAC peaks gained and lost) with RAR $\alpha$  deletion in Th9 conditions. Heatmap (E) displays RAR $\alpha$  effect on motif enrichment and gene expression for Th9-promoting TFs. **F. Cell-intrinsic RAR $\alpha$  effect on Th9-high genes in Th9 cells.** Heatmaps depict log<sub>2</sub> normalized average fold change in gene expression (RAR $\alpha^{\Delta CD4}$  vs. WT, n=3) for Th9-high genes. **G,H. Foxp3 expression in WT vs. RAR $\alpha^{\Delta CD4}$  Th9 cells.** G. Representative flow cytometric plots of IL-9 vs. Foxp3 expression in cells cultured under Th9 conditions with vehicle control or 1000 nM RA. H. Bar graph summarizing Foxp3 expression (n=5). \*\*p<0.01, \*\*\*p<0.005, \*\*\*\*p<0.001, paired t-test. **I. RAR $\alpha$  binding at *Ccr9* RA response element (RARE).** Binding enrichment (ChIP-qPCR) of RAR $\alpha$  relative to input in cells cultured under Th9 conditions with RA or vehicle control. **J. RAR corepressor expression in Th9 cells.** Representative bar graphs display gene expression (rpkm) of five major RAR-associated corepressors in cells cultured under Th9 conditions in cells treated with vehicle control or RA. (n=2, \*FDR<0.05) **K. ChIP-qPCR for NRIP1 at *Ii9* regulatory elements in Th9 cells treated with vehicle control or RA.** Bar graphs summarize binding enrichment for NRIP1 relative to input at the five *Ii9* regulatory elements. **L. NRIP1 binding at *Ccr9* RARE.** Binding enrichment (ChIP-qPCR) of NRIP1 relative to input at *Ccr9* regulatory elements in cells treated with vehicle control or RA. **M. Effect of RA on chromatin accessibility and histone modifications of regulatory elements associated with Th9-high genes, in WT and RAR $\alpha^{\Delta CD4}$  Th9 cells.** Heatmaps depict fold-change in accessibility (ATAC) or histone marks (H3K4M1, H3K4M3, K3K27Ac) at the most strongly RA-regulated peak (greatest fold-change in signal, RA vs. control) in WT and RAR $\alpha^{\Delta CD4}$  Th9 cells polarized in the presence of vehicle control or 1000 nM RA. Genes marked with \* contain STAT5 binding sites, and genes marked with † contain STAT6 binding sites, within their extended loci. **N. Chromatin accessibility and histone modifications at the loci of representative RA-repressed Th9-high gene, STAT5 and STAT6 binding sites, and RA effect on the loci in WT and RAR $\alpha^{\Delta CD4}$  Th9 cells.** *Kynu* and *Sh3bp4* were chosen as representative genes based on similar RA-mediated epigenetic and transcriptional regulation to *Ii9*. Gene tracks show ATAC, H3K4M1, H3K4M3, and H3K27Ac in WT and RAR $\alpha^{\Delta CD4}$  Th9 cells polarized in the presence of vehicle control or 1000 nM RA. Gene tracks also show STAT5B and STAT6 binding sites in Th9 cells based on public data (GSE41317). **O. RAR $\alpha$  binding at the promoters of representative Th9-high genes.** Bar graphs show binding enrichment (ChIP-qPCR) of RAR $\alpha$  relative to input at the *Kynu*, and *Sh3bp4* promoters in cells cultured under Th9 conditions in the presence of control. (For all ChIP-qPCR: n=3, \*p<0.05, \*\*p<0.01, \*\*\*p<0.005, \*\*\*\*p<0.001, unpaired t-test). All pooled data shown as mean  $\pm$  SEM.



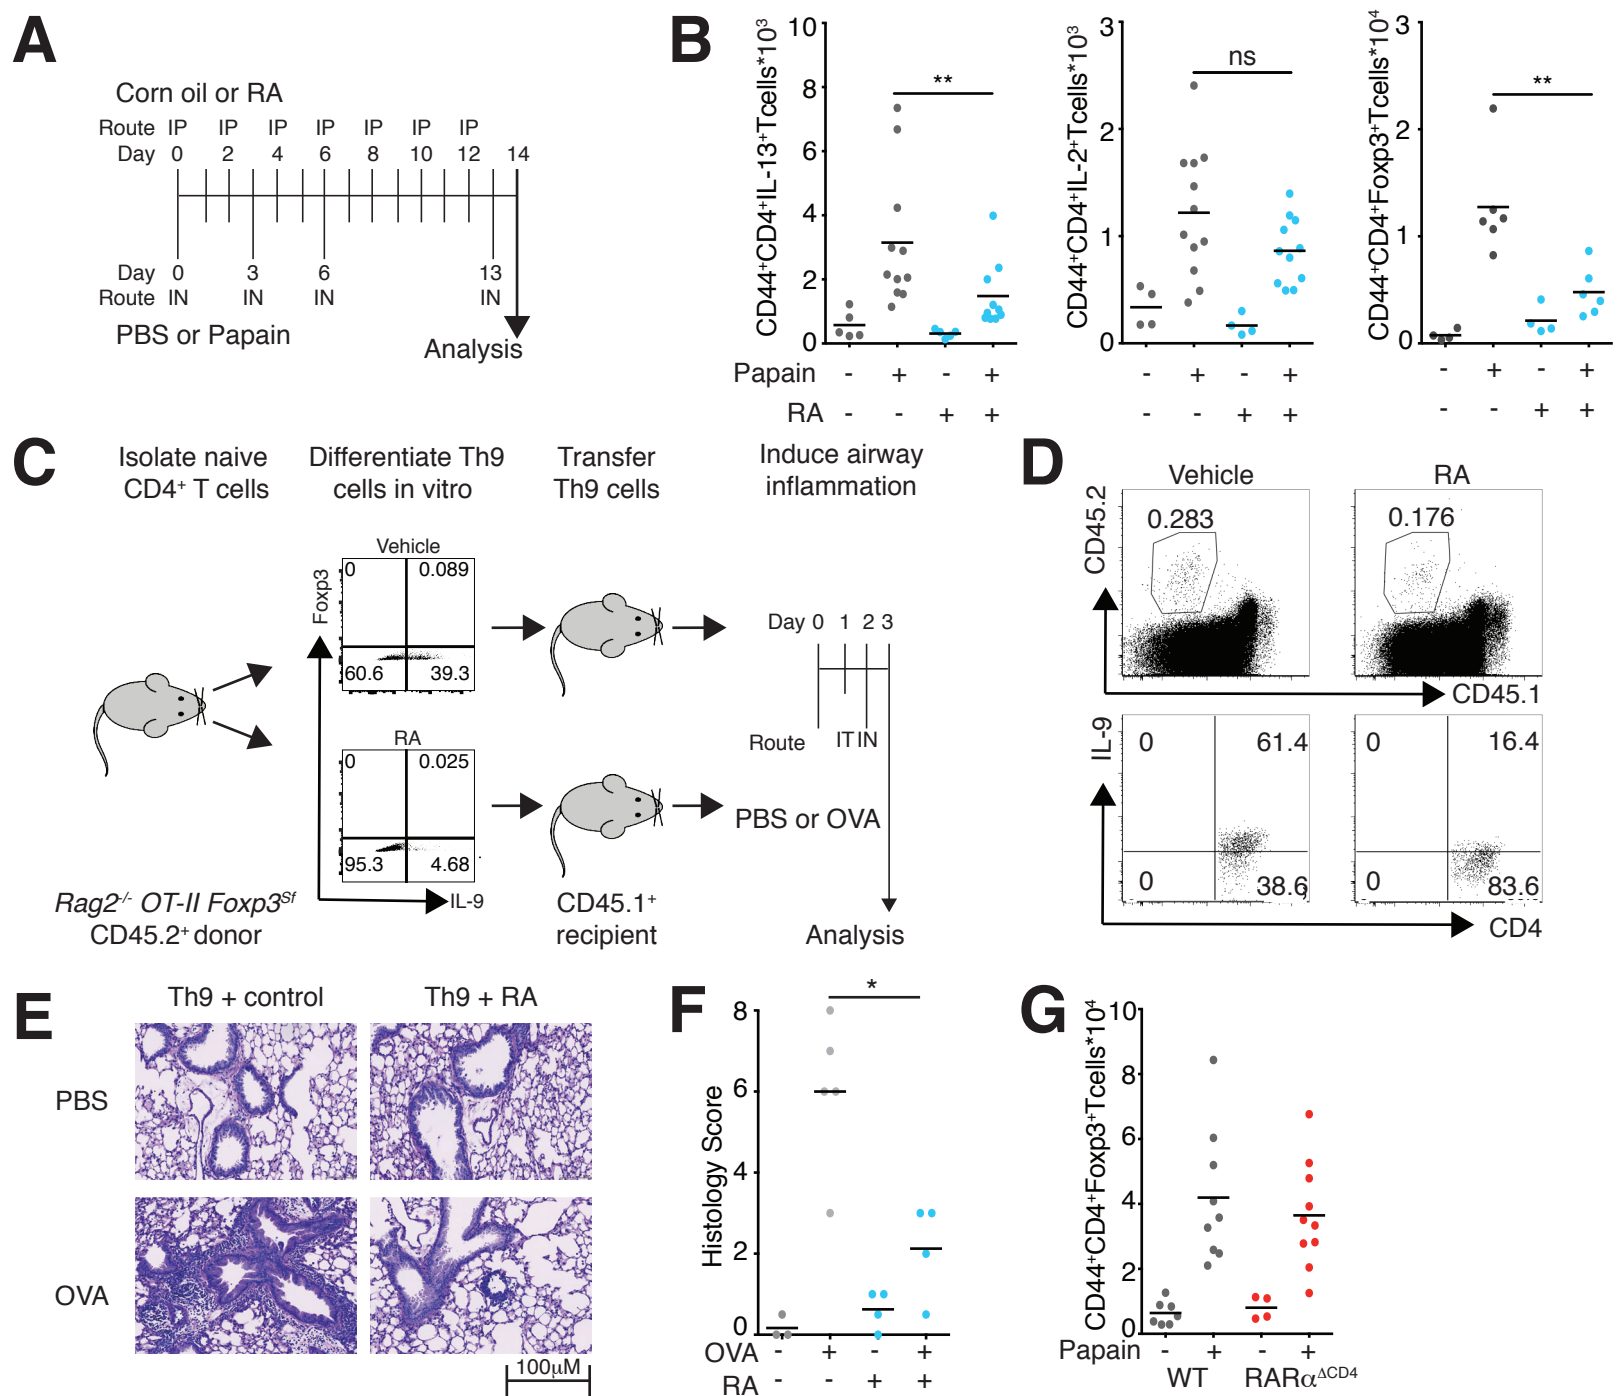

**Figure S5, related to Figure 7. A. Experimental design of papain-induced chronic airway disease.** Mice were exposed to serial intranasal injections of 25  $\mu\text{g}$  papain on d0, 3, 6, and 13. For RA treatment experiments, mice were simultaneously treated with intraperitoneal injections of RA (treatment) or DMSO (control) in corn oil. **B. Flow cytometric analysis of IL-13<sup>+</sup>, IL-2<sup>+</sup>, and Foxp3<sup>+</sup> Lin<sup>-</sup>TCR $\beta$ <sup>+</sup>CD4<sup>+</sup>CD44<sup>hi</sup> cells in lung tissue of mice treated with vehicle control or RA, d14 papain-induced asthma.** Graphs show absolute numbers of Th cells that express IL-13, IL-2, and Foxp3. (1-2 replicates,  $n = 3-5$  per replicate), \* $p < 0.05$ , \*\* $p < 0.01$ , Mann Whitney. **C. Experimental design of Th9 transfer experiment.** Naive CD4<sup>+</sup> T cells were isolated from *Rag2<sup>-/-</sup> OT-II Foxp3<sup>Sf</sup> CD45.2<sup>+</sup>* mice and differentiated *in vitro* under Th9-promoting conditions in the presence of RA (1000nM) or vehicle control. After 72 hours, the Th9 cells were transferred intravenously to CD45.1<sup>+</sup> recipients. Mice were challenged 24 h after transfer intratracheally and 48 h after transfer intranasally with injections of ovalbumin (100 $\mu\text{g}$ ). **D. Flow cytometric analysis of CD45.2<sup>+</sup> (donor) Lin<sup>-</sup>TCR $\beta$ <sup>+</sup>CD4<sup>+</sup>IL-9<sup>+</sup> cells in lung tissue of CD45.1<sup>+</sup> (recipient) mice.** Representative flow cytometric plot reveals fewer IL-9<sup>+</sup> donor T cells in the recipient mice. **E, F. Lung inflammation in mice undergoing transfer with control-treated or RA-treated Th9 cells, after 3-day ovalbumin challenge.** E. Representative images of PAS stained slides demonstrate reduced lymphocytic infiltration in mice undergoing transfer with RA-treated vs. control-treated Th9 cells. F. Pulmonary histology scores in mice undergoing transfer with RA-treated or control-treated Th9 cells. (2 replicates,  $n = 1-3$  per replicate); \*\* $p < 0.01$ , Mann Whitney. **G. Flow cytometric analysis of Foxp3 expressing Lin<sup>-</sup>TCR $\beta$ <sup>+</sup>CD4<sup>+</sup>CD44<sup>hi</sup> cells in lung tissue of in WT or RAR $\alpha^{\Delta\text{CD4}}$  mice, d14 papain-induced asthma.** Graph shows absolute numbers of Th cells expressing Foxp3 (2 replicates,  $n = 3-5$  per replicate); \* $p < 0.05$ , \*\* $p < 0.01$ , Mann Whitney.

**A**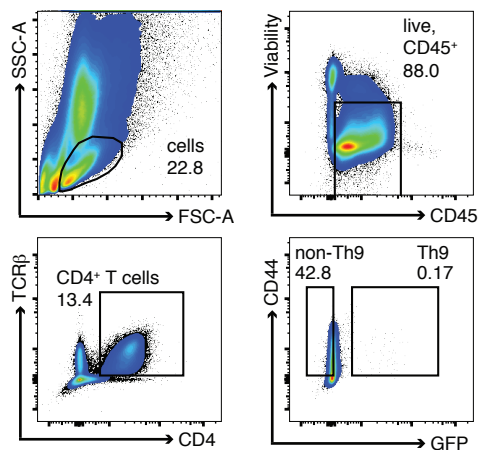**B**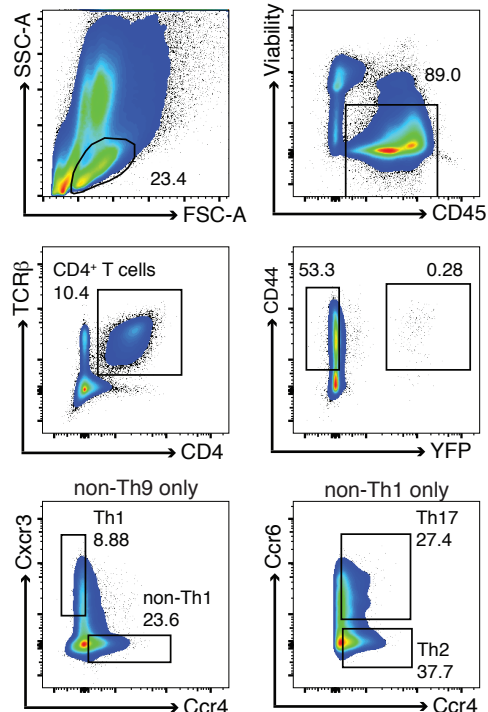**C**

**Th subset signature genes defined by literature (canonical)**

eYFP reporter      GFP reporter

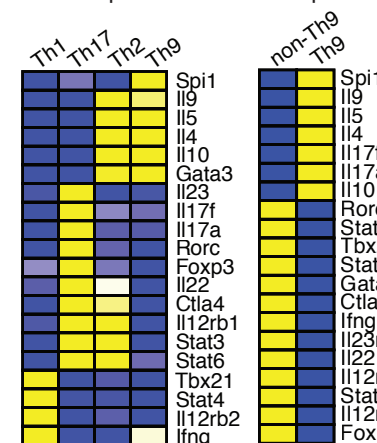

average expression

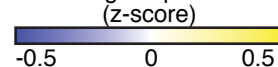**D**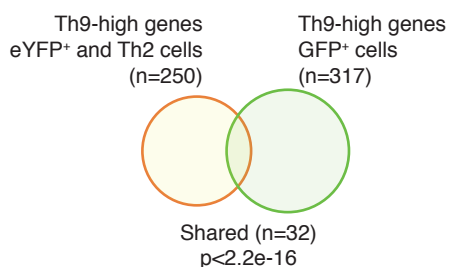**E**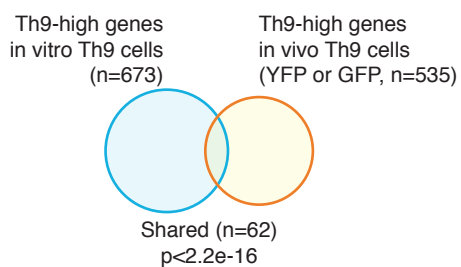**F**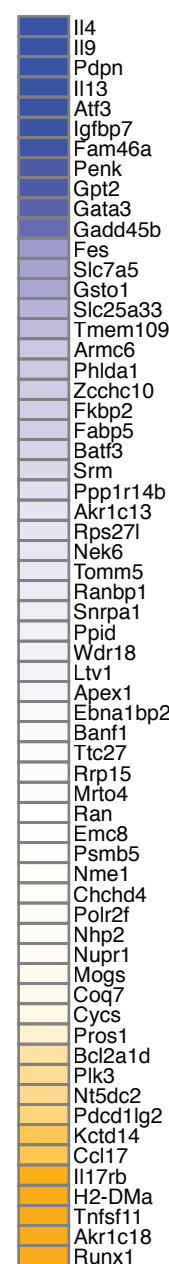**G**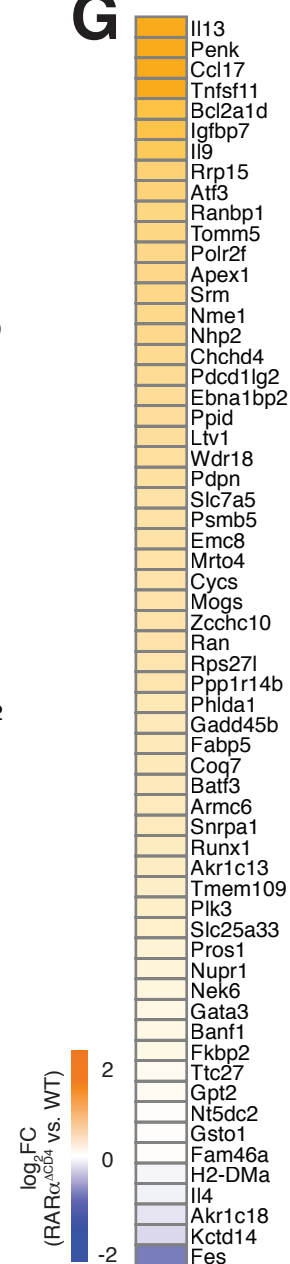**H**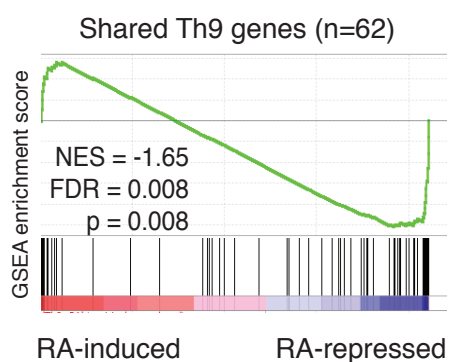**I**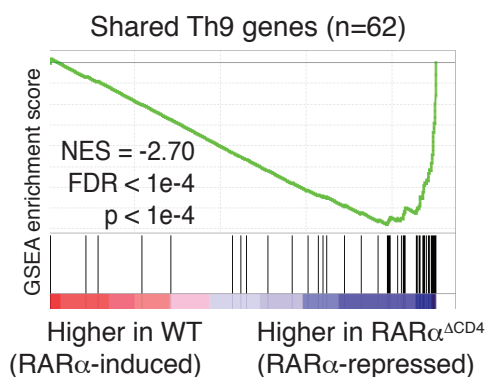

$\log_2 FC$   
(RA vs. control)

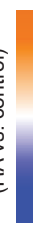

$\log_2 FC$   
(RAR $\alpha^{\Delta D4}$  vs. WT)

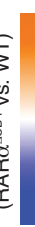

**Figure S6, related to Figure 7. A,B. Sorting strategy for in vivo Th9 cells.** Flow cytometric plots depict fluorescence-activated cell sorting (FACS) strategy from GFP IL-9 reporter mice (A) and eYFP IL-9 fate reporter mice (B). CD4<sup>+</sup> T cells from IL-9 fate reporter mice, cells were sorted based on eYFP expression. eYFP<sup>-</sup> cells were further sorted based on cell surface markers to either Th1 (Cxcr3<sup>+</sup>, Ccr4<sup>-</sup>), Th2 (Cxcr3<sup>-</sup>, Ccr4<sup>+</sup>, Ccr6<sup>-</sup>), or Th17 (Cxcr3<sup>-</sup>, Ccr4<sup>+</sup>, Ccr6<sup>+</sup>) subsets as comparator groups. CD4<sup>+</sup> T cells from IL-9 reporter mice were sorted based on GFP expression. **C. Expression of Th subset signature genes in vivo Th9 cells and other subsets.** Heatmaps depict average expression (reads per kilobase of transcript, or rpkkm) normalized to mean expression of genes known to correlate with Th9 identity *in vivo* (*Il9*, *Spi1*) and of several known Th1, Th2, Th17, and Treg subset signature genes. **D. Overlap between in vivo Th9-high genes using two different models of IL-9 reporting.** Venn diagram depicts the number of differentially expressed (FDR<0.05, FC≥1.5, ANOVA) Th9-high genes (DEGs) defined by eYFP model (comparing IL9 expression eYFP<sup>+</sup> and Th2 cells vs. non IL9-expressing Th1 and Th17 cells, n=250) or GFP model (comparing GFP<sup>+</sup> vs. GFP<sup>-</sup> cells, n=317), in vitro Th9 cells (blue, n=671), and overlap between the two (n=32, p<2.2e-16, Fisher's exact t-test). **E. Overlap between in vitro and in vivo Th9-high genes.** Venn diagram depicts the number of differentially expressed (average FC≥1.5, FDR<0.05, ANOVA) Th9-high genes (DEGs) defined by in vivo Th9 models (eYFP or GFP reporters, n=535), in vitro Th9 cells (blue, n=671), and overlap between the two (n=62, p<2.2e-16, Fisher's exact t-test). Shared Th9 genes were defined by overlap between in vitro and in vivo Th9-high genes. **F-I Shared Th9 genes and RA effect on these genes.** F. Heatmap depicts RA effect (log<sub>2</sub> average fold change in expression, RA vs. control) on expression of shared Th9 genes. G. Heatmap depicts effect effect of RARα deletion (log<sub>2</sub> average fold change in expression, RARα<sup>ΔCD4</sup> vs. WT) on expression of shared Th9 genes. H,I. The effect of RA (H) and RARα (I) on the average, or net, expression of genes in this geneset was tested by GSEA.



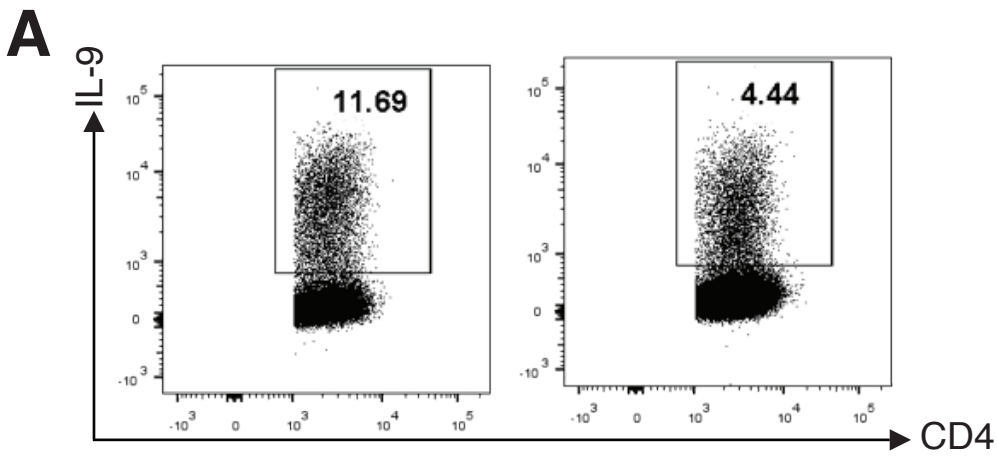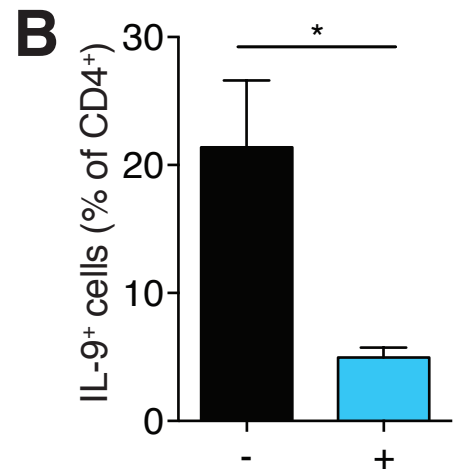

**Effect of house dust mite (HDM) on CD4<sup>+</sup> cells (GSE73482)**

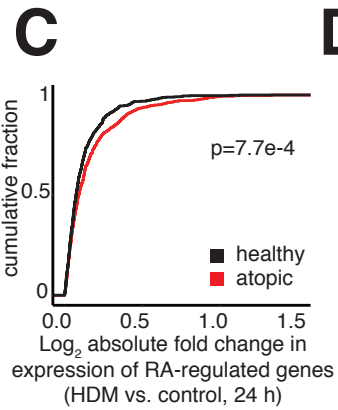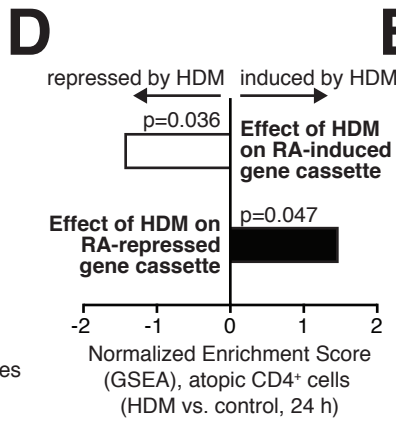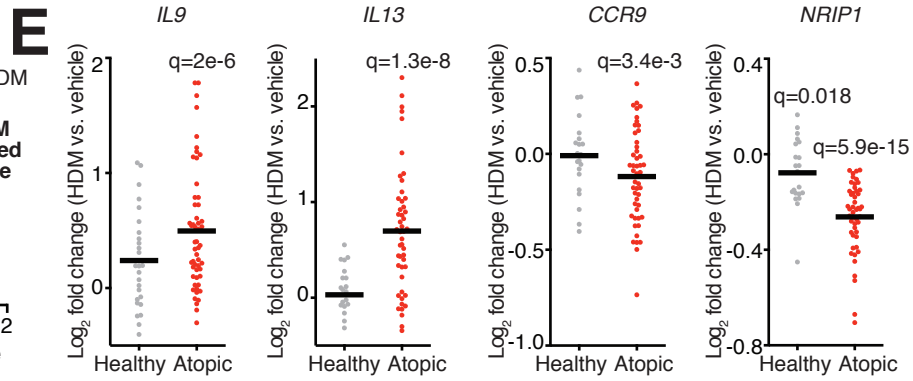

**Effect of nickel on skin (GDS2935)**

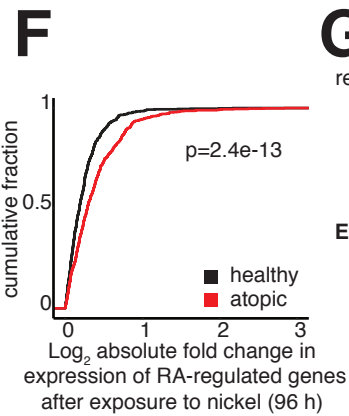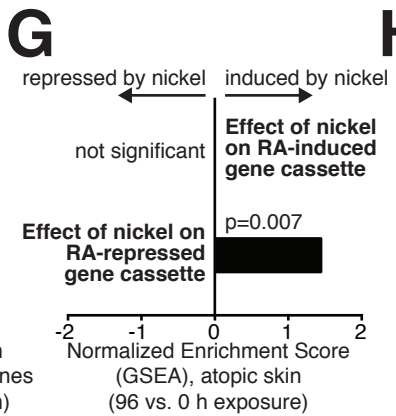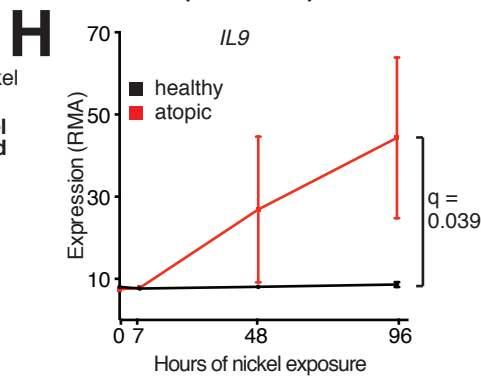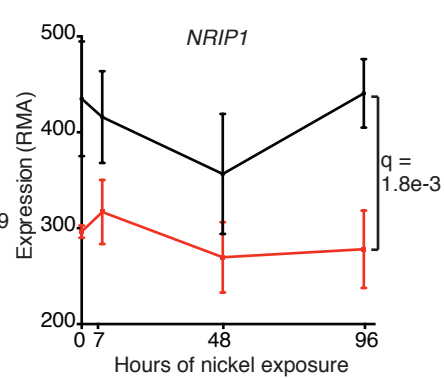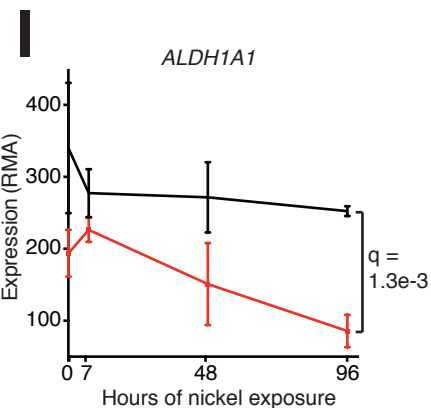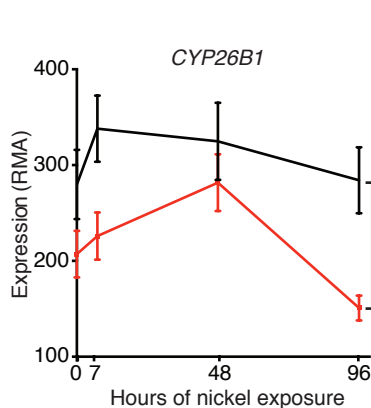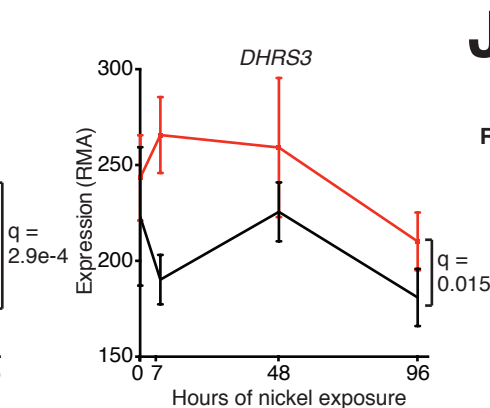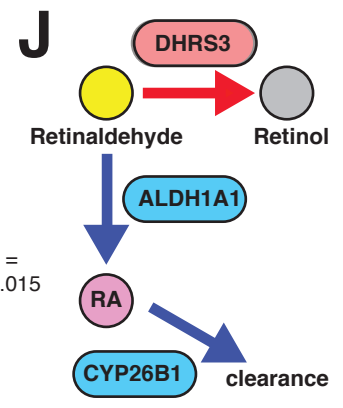

**Figure S7, related to Figure 7. A-B. Flow cytometric analysis of human Th9 cells cultured in the presence of RA vs. vehicle control.** A. Representative plots of IL-9 expression in human Th9 cells differentiated with vehicle control or RA. B. Bar graph summarizing IL-9 expression in Th9 cells cultured with vehicle control or RA (n=4). Pooled data shown as mean + SEM; RA = 1000 nM; \*p<0.05, \*\*p<0.01, \*\*\*p<0.005, \*\*\*\*p<0.001, unpaired t-test. **C-E. Effect of house dust mite extract (HDM) on RA-regulated genes in CD4<sup>+</sup> T cells from healthy (black) or atopic (red) patients (original data from GSE73482).** C. Cumulative distributions indicate that HDM has a significantly greater effect on RA-regulated gene expression in atopic (red) than healthy samples (black), as evaluated by the Kolmogorov-Smirnov test. RA-regulated genes (n=645) are defined in Fig 1B. D. Gene set enrichment analysis (GSEA) in atopic CD4<sup>+</sup> cells finds that HDM significantly represses RA-induced genes (top bar, white) and induces RA-repressed genes (bottom bar, black). GSEA p-value is shown above the corresponding enrichment score. E. HDM's effect on representative RA-repressed (*IL9*, *IL13*) and RA-induced (*CCR9*, *NRIP1*) genes. Each point represents a single patient. Black bars represent mean values. Significance evaluated with FDR-adjusted p-values from paired t-tests. **F-J. Effect of nickel on RA-regulated genes in healthy (black) or nickel-allergic (red) skin (original data from GDS2935).** F. Cumulative distributions indicate that nickel exposure has a significantly greater effect on RA-regulated genes (n=665) in atopic (red) than healthy (black) samples, as evaluated by the Kolmogorov-Smirnov test G. GSEA in nickel-allergic skin samples finds that nickel exposure significantly induces RA-repressed genes (bottom bar), but does not significantly affect RA-induced genes (top bar). H,I. The effect of nickel exposure on representative genes regulated by RA (*IL9*, *NRIP1*) or involved in RA metabolism (*ALDH1A1*, *CYP26NB1*, *DHRS3*) in healthy (black) vs nickel-allergic (red) skin. Significance evaluated with FDR-adjusted p-values from 2-way ANOVA. J. Diagram of RA metabolism illustrating steps upregulated (red) or downregulated (blue) in atopic patients.

**Table S2, primer list. Related to STAR Methods (Immunoprecipitation, Library preparation, and Chip-qPCR; Chromatin Conformational Capture (3C)).**

| Primer                                                       | Sequence                   |
|--------------------------------------------------------------|----------------------------|
| <i>Ilf9</i> promoter forward primer (ChIP)                   | TTCAAACCGGGAAAAACCCT       |
| <i>Ilf9</i> promoter reverse primer (ChIP)                   | GTGACCCCTTCATTACCACC       |
| <i>Ilf9</i> E1 forward primer (ChIP)                         | ATGCAAATGACCCACAGGAA       |
| <i>Ilf9</i> E1 reverse primer (ChIP)                         | TGCGGAATGGGTTTTCACTT       |
| <i>Ilf9</i> E2 forward primer (ChIP)                         | ACAGGTCAGATGGAATGGGA       |
| <i>Ilf9</i> E2 reverse primer (ChIP)                         | ATCACCAGAGATAGACCCCC       |
| <i>Ilf9</i> E3 forward primer (ChIP)                         | GATCTGTTTCTGGCACCCAA       |
| <i>Ilf9</i> E3 reverse primer (ChIP)                         | GGGAAGGTTGCTCTGACAAT       |
| <i>Ilf9</i> DS forward primer (ChIP)                         | GCCTGGGTTTCTATTGCTCG       |
| <i>Ilf9</i> DS reverse primer (ChIP)                         | CTCATTGAGGATCGCAGGGA       |
| <i>Kynu</i> promoter forward primer (ChIP)                   | GATTCAACAGGGTGGGAGGA       |
| <i>Kynu</i> promoter reverse primer (ChIP)                   | TCCCCAAAGGACTGTACCCTAT     |
| <i>Sh3bp4</i> promoter forward primer (ChIP)                 | CACAGGACAAGAGAACCGC        |
| <i>Sh3bp4</i> promoter reverse primer (ChIP)                 | GGGATAGGGTGCGCCG           |
| <i>Ccr9</i> RARE forward primer (ChIP)                       | ACCCTTAACCCCCAGTTTCT       |
| <i>Ccr9</i> RARE reverse primer (ChIP)                       | TTCCGTGCCCGGAGAATTA        |
| Negative control/gene desert forward primer (ChIP)           | AGCTTCCATGCTTGTGGATG       |
| Negative control/gene desert reverse primer (ChIP)           | AGGATGTGGTGGGGTAGGTAA      |
| 3C probe for <i>Ilf9</i> locus (5'FAM-3'BHQ)                 | TGCCAGGAAATACCATTCTCAGAA   |
| 3C anchor for <i>Ilf9</i> locus                              | GTCACCTTGACAAAGGCTGTCT     |
| 3C variable region 1 (+6000bp from <i>Ilf9</i> anchor)       | CTGATGATTCTTGTGGCCATG      |
| 3C variable region 2 (+16000bp from <i>Ilf9</i> anchor)      | AATTCTCTACTTCCACCCCATG     |
| 3C variable region 3 (+19000bp from <i>Ilf9</i> anchor)      | AGGATCTGAATGTGTGTTGGG      |
| 3C variable region 4 (+21500bp from <i>Ilf9</i> anchor)      | CTTACAGTGTAGGCAAGTCGT      |
| 3C variable region 5 (+25000bp from <i>Ilf9</i> anchor)      | GGGCGTCATACTCTTATCCATG     |
| 3C variable region 6 (+28000bp from <i>Ilf9</i> anchor)      | ATGCATGTATCAAACCCTGGC      |
| 3C probe for <i>Fbxl21</i> normalization locus (5'FAM-3'BHQ) | ACCTCCCACCTTCTCTGTTCCCTCAA |
| 3C anchor for <i>Fbxl21</i> normalization locus              | AGTAACACTGGTAGCATCCG       |
| 3C variable region for <i>Fbxl21</i> normalization locus     | CTTTCTCACTGGGCAGAGAA       |

**Table S3, luciferase constructs. Related to STAR Methods (Luciferase detection)**

**Luciferase construct containing Il9 promoter fragment**

CTCGAGCAGTGAGTTGAGCCCCCTTTGCCATCCTCCAGCAGATGACTCTCCCCAGTCCCCTAAATCTACCTTCAGATT  
TTCAATAAGGTAATTGGTGTCTCTGATGCCCATGTGGTGTCTGCATCTCTGGCCAGCACAGAAGTGAAGAGCAAAA  
CAGAGGCAAGGATGTATGTCACCAACATGTTGACGGGAGTCTGGAAGTCACTACCAGCATCTCCAGTCTAGCTG  
TATTTAAAGCTCTTCAAACCGGGAAAAACCCTGACATCAAAGTATACCCAGTGCCCACTTTTTTCTCTGTAAGTTGAG  
GCCAATTGAGATATTGAAAAAAAATCAGTCTGAGTCACTTGACAAAGGCTGTCTTATGCCAGGAAATACCAATTCCTC  
AGAAAAGATGCTCTTCAAATAGTCGGGTTCTGAAATACTAAAGGAAAAGTTAAAGATCTAGCCCCAACCCCTTTAAA  
AGCAGGAATTCTGGTTGTGAGAATCAAACACTTTCCATGAAAGCCCAGGTCTGTGTTTTCCCCTCCACATTAGTGAG  
AAATGCTGATAGACAGTGAGTTACAGGGGTGGTAATGAAGGGGTCACACTGGGGATATCAGGGGAAAGCAAGACTT  
GCCTTTCCTCATTGGGGTTTTCTCTGGCTATTGGAGCCTCAGTTTACTTGATTGCTAGATACTCACAGTATGTCAG  
GCCTAGGAACAAAAGTTCTACCTCGTACATACACCTCTGAGAAGTCGCTCTATGCGAGTATATGAGTTGTTTTCTGTA  
AGTACGTGGATGCTGGAAGTGTCTTGTAGCATTGGCCTTGAGGATCCTTGGAATCAAGCTT

**Luciferase construct containing Il9 promoter fragment + E1 fragment**

GGTACCTTAAGAAGCTGAACATGGAAGCATTGAGGAGTGAGGAGATGACTTGGGGAGCTGAGCCCTTGGTGCAGG  
GCTTGCTCTCATCATGAAGGCTGCAGGAGGAAGGGTTGTGGGACAGGGACTCCCATCCTGTCCCCACAGACCCACA  
CACTCACTTATGCAAACAAGCAGGGTAAGGACTAGGAGGAGAGCACTGCAACTGAGCACACCATTGAGGCAACAA  
GCGCTGTCCAAGCCCTGTGTGACTTTTGAAGCTAGGCTTCTAGGATTTTCTCAGCATCAGACTGCAAGTATGCAAA  
GACCCACAGGAAATACGCCCAACTTCAAATGACTCACTGACATTACCTACAGGGGAAAGCTGGGGAGCTGAACGCA  
GGCCAAGAACGAGTGAGATACTATCTTTTGAATAAATGACAGGGGACAATAATCAACCATTATTTTTGTTCCAAAGA  
TAAAGCTCCACACACTTAGTTTGTGATTAAGCCTAGTGTGTCATAGATTATTTCTACAACAAAATGGCTATTTGTTCT  
AGGAAGTGACAACACAAAATGACCCCCAAAATTTTTTCTTAAATAGCTAAATTTCCAAGTGAAAACCCATTCCGCATT  
TTACTCTATAAACAGTGGAGAGATACTAGTTCCAAGAATCCTTCAGCACTAATTTCTTTGTCAAGTAGTTACTTAGAC  
CAGTATTTCTCATCAGCTATCTGGGGGTAAACCCCTGGATACACTTTTCTCCAAGGAGGATGCTTTTGAGCTGGA  
CACCATGGCCTGCTCCCCAGAATCTCTCCTAAGCCATTCTTCTTTGCCTGATGCTGGGATGCTGTTCCCCTCGAGC  
AGTGAGTTGAGCCCCCTTTGCCATCCTCCAGCAGATGACTCTCCCCAGTCCCCTAAATCTACCTTCAGATTTTCAATA  
AGGTAATTGGTGTCTCTGATGCCCATGTGGTGTCTGCATCTCTGGCCAGCACAGAAGTGAAGAGCAAAACAGAGGC  
AAGGATGTATGTCACCAACATGTTGACGGGAGTCTGGAAGTCACTACCAGCATCTCCAGTCTAGCTGTATTTAAA  
GCTCTTCAAACCGGGAAAAACCCTGACATCAAAGTATACCCAGTGCCCACTTTTTTCTCTGTAAGTTGAGGCCAATT  
GAGATATTGAAAAAAAATCAGTCTGAGTCACTTGACAAAGGCTGTCTTATGCCAGGAAATACCAATTCCTCAGAAAAG  
ATGCTCTTCAAATAGTCGGGTTCTGAAATACTAAAGGAAAAGTTAAAGATCTAGCCCCAACCCCTTTAAAAGCAGGA  
ATTCTGGTTGTGAGAATCAAACACTTTCCATGAAAGCCCAGGTCTGTGTTTTCCCCTCCACATTAGTGAGAAATGCT  
GATAGACAGTGAGTTACAGGGGTGGTAATGAAGGGGTCACACTGGGGATATCAGGGGAAAGCAAGACTTGCCTTTC  
ACTCATTGGGGTTTTCTCTGGCTATTGGAGCCTCAGTTTACTTGATTGCTAGATACTCACAGTATGTCAGGCCTAGG  
AACAAAAGTTCTACCTCGTACATACACCTCTGAGAAGTCGCTCTATGCGAGTATATGAGTTGTTTTCTGTAAGTACGTG  
GATGCTGGAAGTGTGCTTGTAGCATTGGCCTTGAGGATCCTTGGAATCAAGCTT

**Luciferase construct containing Il9 promoter fragment + E2 fragment**

GGCCTAACTGGCCGGTACCTCCAGGATTTTGTCTCATTGTTGGAAATTGGGGGGTCTATCTCTGGTGATACCCTCAC  
CACATCCAGCACACCTGAGACATAATGCGTACTCTCCAGCAAAGGTCTGGCTCACCCGACTGCACACTTCAGTGTG  
TGCCTGCAAAAATGATAGTGTTCAGCTTGATTTCAGAAAATGATAGGCAAAGCAGAGAGAGAGAGTACCCCGCT  
TGTGTGATGTTAGTAAGAGGTAGATGGCGGATCCCCTGGAGTGTCTGTACATGCTTCTCAGTAACCACGGGGACTC  
TCCAGTGGCCAGGACTTCTATTACAGTCGGCTGCTGGAGTTTCATTTTGGCTCAAAGAGCACAGTATTCGCTGTCTTT  
CCTTGAAAATGGTGGCGTGCGTTTGTGAATTTTCTTTGCCAGGGTCTCTTTGGTCAACTGAGTTTATTTATGATCT  
GGAGAAAGTAGTCCCTAGTGTCTTTCTAGGAAAAGTCAACACTCTGGGTGAGTGTCTGTCTGGGTTAGGATCTGAAT  
GTGTGTTGGGATCTTGTCTAATCAGATCTTCAGAACCATTTGATTCAGCTGAGCACTGTCTGTCTGGAACTTGCT  
ATCTCCTGGACTCCAGTTCACTGCACATTCCGGTCTCAAATGCAACCTCATTTCTGTGGGCTCTGAGGTGCCTTCAGG  
ATTTAGTGTACTTACAATGGGTTGTCTTAGGTCAGGTAGTATACCTGAGGTAGTCTCTGATCTTTCTGGCATGACTTA  
AAGCTCGAGCAGTGAGTTGAGCCCCCTTTGCCATCCTCCAGCAGATGACTCTCCCCAGTCCCCTAAATCTACCTTCA  
GATTTTCAATAAGGTAATTGGTGTCTCTGATGCCCATGTGGTGTCTGCATCTCTGGCCAGCACAGAAGTGAAGAGC  
AAAACAGAGGCAAGGATGTATGTCACCAACATGTTGACGGGAGTCTGGAAGTCACTACCAGCATCTCCAGTCTA  
GCTGTATTTAAAGCTCTTCAAACCGGGAAAAACCCTGACATCAAAGTATACCCAGTGCCCACTTTTTTCTCTGTAAGT  
TGAGGCCAATTGAGATATTGAAAAAAAATCAGTCTGAGTCACTTGACAAAGGCTGTCTTATGCCAGGAAATACCAAT  
CCTCAGAAAAGATGCTCTTCAAATAGTCGGGTTCTGAAATACTAAAGGAAAAGTTAAAGATCTAGCCCCAACCCCTT  
TAAAAGCAGGAATTCTGGTTGTGAGAATCAAACACTTTCCATGAAAGCCCAGGTCTGTGTTTTCCCCTCCACATTAG  
TGAGAAATGCTGATAGACAGTGAGTTACAGGGGTGGTAATGAAGGGGTCACACTGGGGATATCAGGGGAAAGCAAG  
ACTTGCCTTTCCTCATTGGGGTTTTCTCTGGCTATTGGAGCCTCAGTTTACTTGATTGCTAGATACTCACAGTATGT

CAGGCCTAGGAACAAAAGTTCTACCTCGTACATACACCTCTGAGAAGTCGCTCTATGCGAGTATATGAGTTGTTTTCT  
GTAAGTACGTGGATGCTGGAAGTGTGCTTGCTAGCATTGGCCTTGAGGATTCCTTGGAATCAAGCTT

**Luciferase construct containing I19 promoter fragment + E3 fragment**

GGTACCTATAAAAGGATGGGCAAGCCAACCTCTCAGCATGTGTTTATATCTGTAAAGAATCACTGGACGTATTGCTTGT  
CATGACTGAATTTAAACTAGAAAATGGCAAGTTTTAAAGTGGTCGCCTGCTTTGACAAAGCTATGCAAAACACACTCT  
TTTAGTGATCTGTTTCTGGCACCCAAACATTTTTTTTTGTCTCAGCACAAGTCTTCTGCATCCTGTTTGTGGTTTAAAAG  
GAAAAAATCTGATCAGAGAGACTGATACAGCTCATACTAAATGATTGTCAGAGCAACCTTCCCACCTCCTCCTCCTC  
CTTCTCAAACATTCGAGTTTGTAAAACTCTATTCAGTGTGCTACTAAACCCACCGAGTGCCACACTTTTACATGATT  
TGCCCAACATGGAACCTCTGAAAATCTGCTGTCTACACCGCCATAGACCTGTCATAAGCAGTTCATGGAAATTGGCA  
TGATGAGGACTGGTATCAAGAGTCACTATCTTCTGTTACCTCATTCACTCCTAATCTTCAAGCCCCTGTGGTCTGAGG  
TTTCTCTTGCAAGTTTCTTTTGTTCAGTTTAAAGAAAAACAGCTGCTTGGCAGACAAGCCTCATGACATCCTTTGAAGTC  
TTGTAAGATACTCGTTAGCAAATTATAAGGTCTGCTAAACAAAGGAAAAACCTCGAGCAGTGAGTTGAGCCCCCTTTG  
CCATCCTCCAGCAGATGACTCTCCCCAGTCCCCTAAATCTACCTTCAGATTTTCAATAAGGTAATTGGTGTCTCTGATG  
CCCCATGTGGTGCTGCATCTCTGGCCAGCACAGAAGTGAAGAGCAAAACAGAGGCAAGGATGTATGTCACCAACAT  
GTTGACGGGAGTCTGGAACCTCAGTCTACCAGCATCTTCCAGTCTAGCTGTATTTAAAGCTCTTCAAACCGGGAAAAAC  
CCTGACATCAAACCTGATACCCAGTGCCCACTTTTTTCTCTGTAAGTTGAGGCCAATTGAGATATTGAAAAAAAATCAG  
TCTGAGTCACTTGACAAAGGCTGTCTTATGCCAGGAAATACCATTCCTCAGAAAAGATGCTCTTCAAATAGTCGGGTT  
CTGAAATACTAAAGGAAAAGTTAAAGATCTAGCCCCAACCCCTTTAAAAGCAGGAATTCTGGTTGTGAGAATCAAAA  
CACTTTCCATGAAAGCCCAGGTCTGTGTTTTCCCTCCACATTAGTGAGAAATGCTGATAGACAGTGAGTTACAGGGG  
TGGTAATGAAGGGGTCACACTGGGGATATCAGGGGAAAGCAAGACTTGCCTTTCACTCATTGGGGTTTTCTCTGGC  
TATTGGAGCCTCAGTTTACTTGATTGCTAGATACTCACAGTATGTCAGGCCTAGGAACAAAAGTTCTACCTCGTACATA  
CACCTCTGAGAAGTCGCTCTATGCGAGTATATGAGTTGTTTTCTGTAAGTACGTGGATGCTGGAAGTGTGCTTGCTAG  
CATTGGCCTTGAGGATTCCTTGGAATCAAGCTT

**Consensus gamma interferon activation site (GAS) that binds to STAT5**

Half GAS
